# Supplementary material
Source: Research Square preprint supplement (doi:10.21203/rs.3.rs-9465529/v1)
Supplement: Supplementary file 1 [file dac1f33df6e4a1086b876776.docx]

Supplementary Information

**Optimization of mRNA Thermal Release on an Integrated Microfluidic Platform by a Complex System Response Method**

Swati T. Gurme1, Yi-Cheng Tsai1, Bhushan Koparde1, Da-Jeng Yao2, Lily Hui-Ching Wang3**, and Gwo-Bin Lee1,4*

1Department of Power Mechanical Engineering, National Tsing Hua University, Hsinchu

30013, Taiwan

2Institute of NanoEngineering and MicroSystems, National Tsing Hua University, Hsinchu

30013, Taiwan

3School of Medicine, National Tsing Hua University, Hsinchu 30013, Taiwan

4Institute of Biomedical Engineering, National Tsing Hua University, Hsinchu 30013, Taiwan

***Corresponding author details:**

Prof. Gwo-Bin Lee

Department of Power Mechanical Engineering,

National Tsing Hua University, Hsinchu, 30013, Taiwan

**Email address:** gwobin@pme.nthu.edu.tw

****Co-corresponding author details:**

Prof. Lily Hui-Ching Wang

School of Medicine,

National Tsing Hua University, Hsinchu, 30013, Taiwan

**Email address:** wang.huiching@gmail.com

**Table S1.** The workflow of transcription-translation coupled with the association of puromycin linker (TRAP) display on the microfluidic chip. IVT = in vitro transcription; MB = magnetic beads

| Step | Volume (µL) | Chamber(s) used | Applied gauge pressure (kPa) |
| --- | --- | --- | --- |
| IVT | 20 | A, D | -35/20 |
| DNase treatment | 35 | B | -35/20 |
| mRNA+ probe-MB hybridization | 35 | C, D | -35/20 |
| Washing | 25 | F🡪D🡪E🡪W | -20/20 |
| Thermal release | 10 | E | -35/20 |
| mRNA + puromycin linker annealing | 10 | I | - |
| Reverse transcription | 20 | J | -35/20 |
